# Supplementary material for: Genetic polymorphisms in the vitamin D pathway in relation to lung cancer risk and survival
Source: PubMed Central journal article supplement (PMC4385872; doi:10.18632/oncotarget.2951), 2014-12-10
Supplement: oncotarget-06-2573-s001.pdf [file oncotarget-06-2573-s001.pdf]

## Genetic polymorphisms in the vitamin D pathway in relation to lung cancer risk and survival

### Supplementary Material

Supplement table 1: Associations between NSCLC survival and expression of CYP27B1 and CYP24A1

| Factor                            | Overall Survival                      |                  | HR <sup>a</sup> (95%CI <sup>b</sup> ) |                        |
|-----------------------------------|---------------------------------------|------------------|---------------------------------------|------------------------|
|                                   | HR <sup>a</sup> (95%CI <sup>b</sup> ) | P value          | Age≥60                                | Age<60                 |
| <u>Univariate analysis</u>        | n=153                                 |                  |                                       |                        |
| CYP27B1 mRNA (High vs. Low)       | <b>0.60(0.39-0.92)</b>                | <b>0.020</b>     | <b>0.48(0.26-0.88)</b>                | 0.74(0.40-1.36)        |
| CYP24A1 mRNA (High vs. Low)       | 0.90(0.58-1.38)                       | 0.621            | 0.92(0.50-1.70)                       | 0.87(0.47-1.62)        |
| <u>Multivariate analysis</u>      | n=153                                 |                  |                                       |                        |
| CYP27B1 mRNA (High vs. Low)       | 0.79(0.50-1.26)                       | 0.327            | <b>0.51(0.26-0.98)</b>                | 1.27(0.61-2.67)        |
| Age (≥60 vs.<60)                  | 1.26(0.80-1.98)                       | 0.314            | -                                     | -                      |
| Gender (Female vs. Male)          | 0.88(0.55-1.41)                       | 0.603            | 1.45(0.66-3.16)                       | 0.92(0.44-1.91)        |
| Disease stage (III-IV vs. I - II) | <b>5.59(3.44-9.08)</b>                | <b>&lt;0.001</b> | <b>7.89(3.78-16.46)</b>               | <b>4.97(2.48-9.95)</b> |
| Chemotherapy(Yes vs. No)          | 1.14(0.70-1.88)                       | 0.595            | 1.07(0.54-2.13)                       | 1.58(0.71-3.54)        |
| Histological type                 | 1.12(0.80-1.56)                       | 0.511            | 1.14(0.65-2.01)                       | 1.11(0.71-1.73)        |

a. HR: Hazards Ratio.

b. CI: Confidence Interval.
